# Supplementary material for: Mediterranean-Style Diet and Other Determinants of Well-Being in Omnivorous, Vegetarian, and Vegan Women
Source: MDPI journal article supplement (doi:10.3390/nu15030725), 2023-02-01
Supplement: s1 [file s1]

Table S1. Modified Mediterranean diet score (mMDS) components and scoring criteria (n=636).

| Food group                    | Median<br>(servings/day) | Scoring<br>criteria<br>(1 point) | Percent of women<br>who met the scoring criteria |             |        |
|-------------------------------|--------------------------|----------------------------------|--------------------------------------------------|-------------|--------|
|                               |                          |                                  | Omnivores                                        | Vegetarians | Vegans |
| Vegetables                    | 2.50                     | $\geq$ median                    | 44.2                                             | 72.5        | 83.1   |
| Legumes                       | 0.14                     | $\geq$ median                    | 26.9                                             | 84.4        | 95.2   |
| Fruit                         | 1.00                     | $\geq$ median                    | 47.8                                             | 69.2        | 81.5   |
| Nuts and seeds                | 0.14                     | $\geq$ median                    | 50.2                                             | 77.7        | 85.5   |
| Wholegrains                   | 1.0                      | $\geq$ median                    | 41.9                                             | 70.6        | 75.8   |
| Fish                          | 0                        | $\geq$ median                    | 74.8                                             | 0           | 0      |
| Dairy or dairy<br>substitutes | 0.79                     | $<$ median                       | 48.2                                             | 39.8        | 41.9   |
| Meat or meat<br>substitutes   | 0.43                     | $<$ median                       | 16.9                                             | 72.0        | 57.3   |
| Vitamin D<br>supplement use   | -                        | yes                              | 42.9                                             | 49.3        | 62.1   |
| Ethanol intake †              | -                        | 5 – 25 g/day                     | 5.6                                              | 8.5         | 8.9    |

†Low:  $<5$  g/day; moderate:  $\geq 5$  g/day and  $\leq 25$  g/day; high:  $>25$  g/day.
